# Supplementary material
Source: ML conference proceedings conference paper supplement (https://proceedings.mlr.press/v97/ishida19a.html)
Supplement: Supplementary file [file ishida19a-supp.pdf]

## A. Proof of Theorem 1

*Proof.* First of all,

$$\begin{aligned} \mathbb{P}(X, \bar{Y} = \bar{y}) &= \frac{1}{K-1} \sum_{y \neq \bar{y}} \mathbb{P}(X, Y = y) \\ &= \frac{1}{K-1} \left( \sum_{y=1}^K \mathbb{P}(X, Y = y) - \mathbb{P}(X, Y = \bar{y}) \right) \\ &= \frac{1}{K-1} (\mathbb{P}(X) - \mathbb{P}(X, Y = \bar{y})). \end{aligned}$$

The first equality holds since the marginal distribution is equivalent for  $\mathcal{D}$  and  $\bar{\mathcal{D}}$  and we assume (5). Consequently,

$$\begin{aligned} \mathbb{P}(\bar{Y} = \bar{y} | X = x) &= \frac{\mathbb{P}(X = x, \bar{Y} = \bar{y})}{\mathbb{P}(X = x)} \\ &= \frac{1}{K-1} \cdot \left( 1 - \frac{\mathbb{P}(X, Y = \bar{y})}{\mathbb{P}(X = x)} \right) \\ &= \frac{1}{K-1} \cdot (1 - \mathbb{P}(Y = \bar{y} | X = x)) \\ &= -\frac{1}{K-1} \mathbb{P}(Y = \bar{y} | X = x) + \frac{1}{K-1}. \end{aligned}$$

More simply, we have  $\boldsymbol{\eta}(x) = -(K-1)\bar{\boldsymbol{\eta}}(x) + \mathbf{1}$ . Finally, we transform the classification risk,

$$\begin{aligned} R(g; \ell) &= \mathbb{E}_{(X, Y) \sim \mathcal{D}}[\ell(Y, \mathbf{g}(X))] = \mathbb{E}_{X \sim M}[\boldsymbol{\eta}^\top \ell(\mathbf{g}(X))] \\ &= \mathbb{E}_{X \sim M} [(- (K-1)\bar{\boldsymbol{\eta}}^\top + \mathbf{1}^\top) \ell(\mathbf{g}(X))] \\ &= \mathbb{E}_{X \sim M} [- (K-1)\bar{\boldsymbol{\eta}}^\top \ell(\mathbf{g}(X)) + \mathbf{1}^\top \ell(\mathbf{g}(X))] \\ &= \mathbb{E}_{(X, \bar{Y}) \sim \bar{\mathcal{D}}} [- (K-1) \cdot \ell(\bar{Y}, \mathbf{g}(X))] \\ &\quad + \mathbf{1}^\top \mathbb{E}_{X \sim M} [\ell(\mathbf{g}(X))] \\ &= \sum_{k=1}^K \bar{\pi}_k \cdot \mathbb{E}_{X \sim \bar{P}_k} [- (K-1) \cdot \ell(k, \mathbf{g}(X))] \\ &\quad + \mathbf{1}^\top \ell(\mathbf{g}(X))] \\ &= \bar{R}(g; \bar{\ell}) \end{aligned}$$

for the complementary loss,  $\bar{\ell}(k, \mathbf{g}) := -(K-1)\ell(k, \mathbf{g}) + \mathbf{1}^\top \ell(\mathbf{g})$ , which concludes the proof.  $\square$

## B. Proof of Corollary 2

*Proof.*

$$\begin{aligned} \bar{R}(g; \bar{\ell}) &= \mathbb{E}_{\bar{\mathcal{D}}}[\bar{\ell}(\bar{Y}, \mathbf{g}(X))] \\ &= \mathbb{E}_{\bar{\mathcal{D}}}[-(K-1)\ell(\bar{Y}, \mathbf{g}(X)) + \sum_{j=1}^K \ell(j, \mathbf{g}(X))] \\ &= \mathbb{E}_{\bar{\mathcal{D}}}[-(K-1)[M_2 - \bar{\ell}(\bar{Y}, \mathbf{g}(X))] + M_1] \\ &= (K-1)\mathbb{E}_{\bar{\mathcal{D}}}[\bar{\ell}(\bar{Y}, \mathbf{g}(X))] + M_1 - (K-1)M_2 \\ &= (K-1)\mathbb{E}_{\bar{\mathcal{D}}}[\bar{\ell}(\bar{Y}, \mathbf{g}(X))] - M_1 + M_2 \end{aligned}$$

**Table 3:** Summary statistics of benchmark datasets. In the experiments with validation dataset in Section 4.2, train data is further splitted into train/validation with a ratio of 9:1. Fashion is Fashion-MNIST and Kuzushi is Kuzushi-MNIST.

| Name     | # Train | # Test | # Dim | # Classes | Model            |
|----------|---------|--------|-------|-----------|------------------|
| MNIST    | 60k     | 10k    | 784   | 10        | Linear, MLP      |
| Fashion  | 60k     | 10k    | 784   | 10        | Linear, MLP      |
| Kuzushi  | 60k     | 10k    | 784   | 10        | Linear, MLP      |
| CIFAR-10 | 50k     | 10k    | 2,048 | 10        | DenseNet, Resnet |

The second equality holds because we use (10). The third equality holds because we are using losses that satisfy  $\sum_j \ell(j, \mathbf{g}(x)) = M_1$  for all  $x$  and  $\ell(\bar{y}, \mathbf{g}(x)) + \bar{\ell}(\bar{y}, \mathbf{g}(x)) = M_2$  for all  $x$  and  $\bar{y}$ . The 4th equality rearranges terms. The 5th equality holds because  $M_1 - (K-1)M_2 = -M_1 + M_2$  for  $\bar{\ell}_{\text{OVA}}$  and  $\bar{\ell}_{\text{PC}}$ . This can be easily shown by using  $M_1 = K$  and  $M_2 = 2$  for  $\bar{\ell}_{\text{OVA}}$ , and  $M_1 = K(K-1)/2$  and  $M_2 = K-1$  for  $\bar{\ell}_{\text{PC}}$ .  $\square$

## C. Datasets

In the experiments in Section 4, we use 4 benchmark datasets explained below. The summary statistics of the four datasets are given in Table 3.

- MNIST<sup>4</sup> (Lecun et al., 1998) is a 10 class dataset of handwritten digits: 1, 2, ..., 9 and 0. Each sample is a  $28 \times 28$  grayscale image.
- Fashion-MNIST<sup>5</sup> (Xiao et al., 2017) is a 10 class dataset of fashion items: T-shirt/top, Trouser, Pullover, Dress, Coat, Sandal, Shirt, Sneaker, Bag, and Ankle boot. Each sample is a  $28 \times 28$  grayscale image.
- Kuzushi-MNIST<sup>6</sup> (Clanuwat et al., 2018) is a 10 class dataset of cursive Japanese (“Kuzushiji”) characters. Each sample is a  $28 \times 28$  grayscale image.
- CIFAR-10<sup>7</sup> is a 10 class dataset of various objects: airplane, automobile, bird, cat, deer, dog, frog, horse, ship, and truck. Each sample is a colored image in  $32 \times 32 \times 3$  RGB format. It is a subset of the 80 million tiny images dataset (Torralba et al., 2008).

<sup>4</sup><http://yann.lecun.com/exdb/mnist/>

<sup>5</sup><https://github.com/zalandoresearch/fashion-mnist>

<sup>6</sup><https://github.com/rois-codh/kmnist>

<sup>7</sup><https://www.cs.toronto.edu/~kriz/cifar.html>
